# Supplementary material
Source: PubMed Central journal article supplement (PMC10339222)
Supplement: jamapsychiatry-e232206-s002.pdf [file jamapsychiatry-e232206-s002.pdf]

## Data Sharing Statement

Kessing. Lifetime Incidence of Treated Mental Health Disorders and Psychotropic Drug Prescriptions and Associated Socioeconomic Functioning. *JAMA Psychiatry*. Published July 12, 2023. doi:10.1001/jamapsychiatry.2023.2206

### Data

**Data available:** No

### Additional Information

**Explanation for why data not available:** Data for this study is property of Statistic Denmark and the Danish Health Data Authority. The data are available from the authorities, but restrictions apply.
